# Supplementary material for: IL-3 promotes the development of experimental autoimmune encephalitis
Source: JCI journal article supplement (doi:10.1172/jci.insight.87157), 2016-10-05
Supplement: sd1 [file 1]

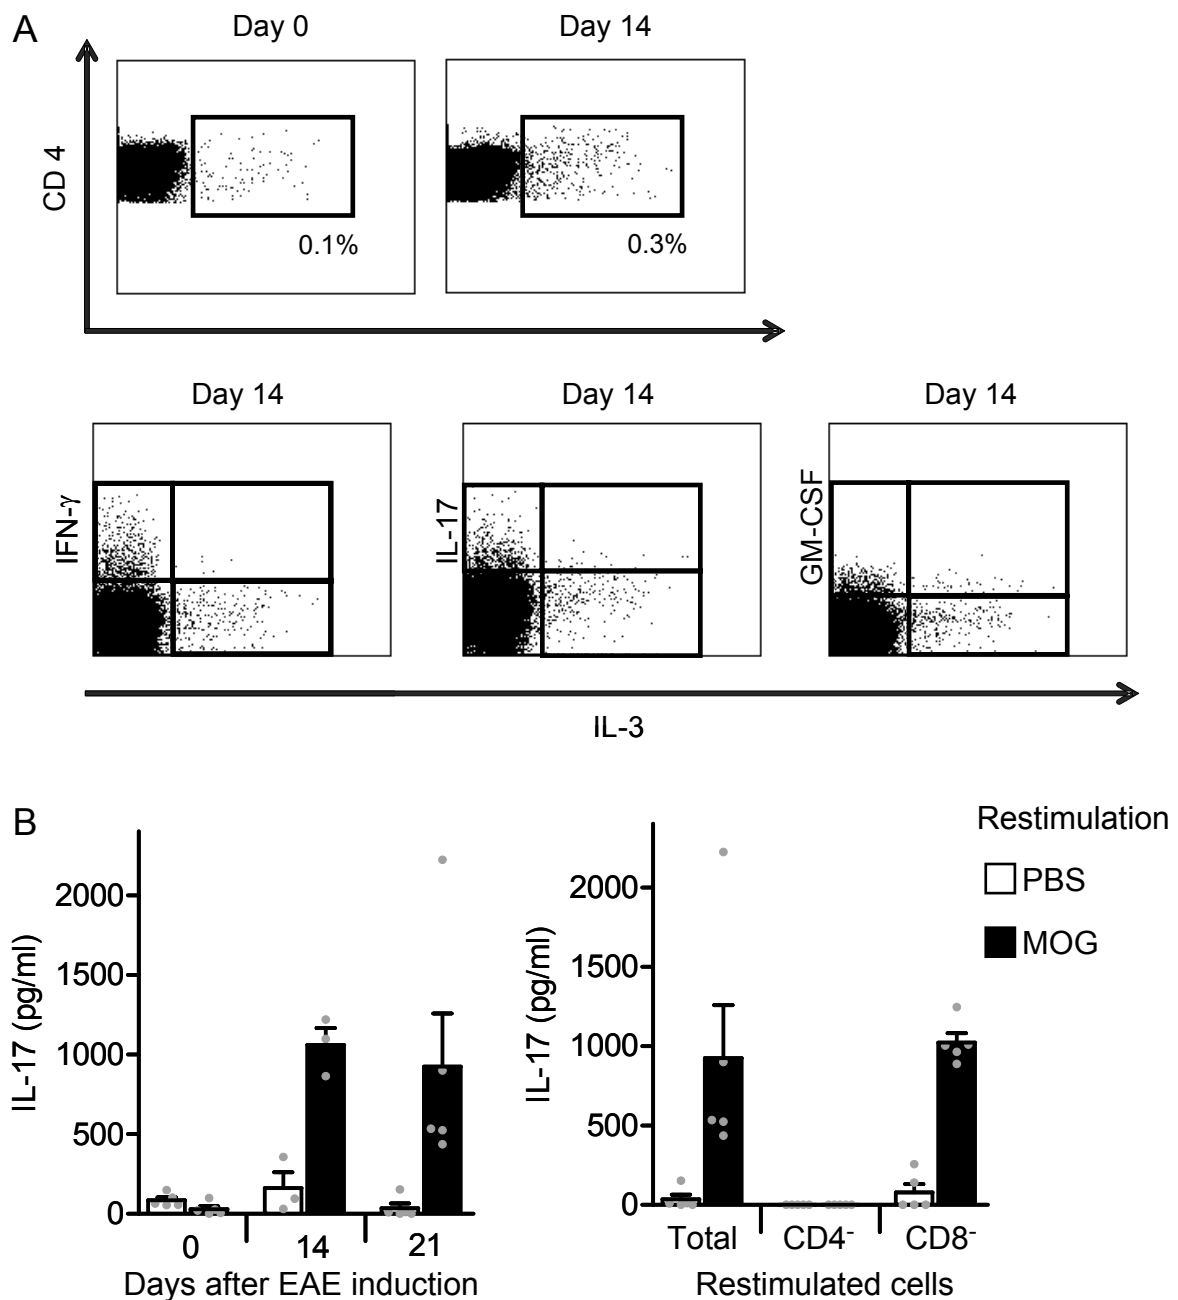

**Supplemental Figure S1. FACS plots showing IL-3 expression by CD4<sup>+</sup> T cells and IL-17 release by restimulated splenocytes.**

C57BL/6 mice were immunized with MOG-peptide 35-55 on day 0. Before immunization (day 0) or 14 and 21 days after immunization (3-5 mice / time point) splenocytes were analyzed. (A) Representative FACS-plots showing IL-3<sup>+</sup>CD4<sup>+</sup> T cells on day 0 and 14 (upper panel). Co-staining of CD4<sup>+</sup> T cells for expression of IL-3, IFN- $\gamma$ , IL-17 and GM-CSF on day 14 (lower panel). (B) Total splenocytes (left) and splenocytes depleted of CD4<sup>+</sup> or CD8<sup>+</sup> T cells (right, day 21) were restimulated with MOG-peptide 35-55 or PBS as control for 3 days and IL-17 was measured in the supernatant. Data are represented as mean  $\pm$  SEM

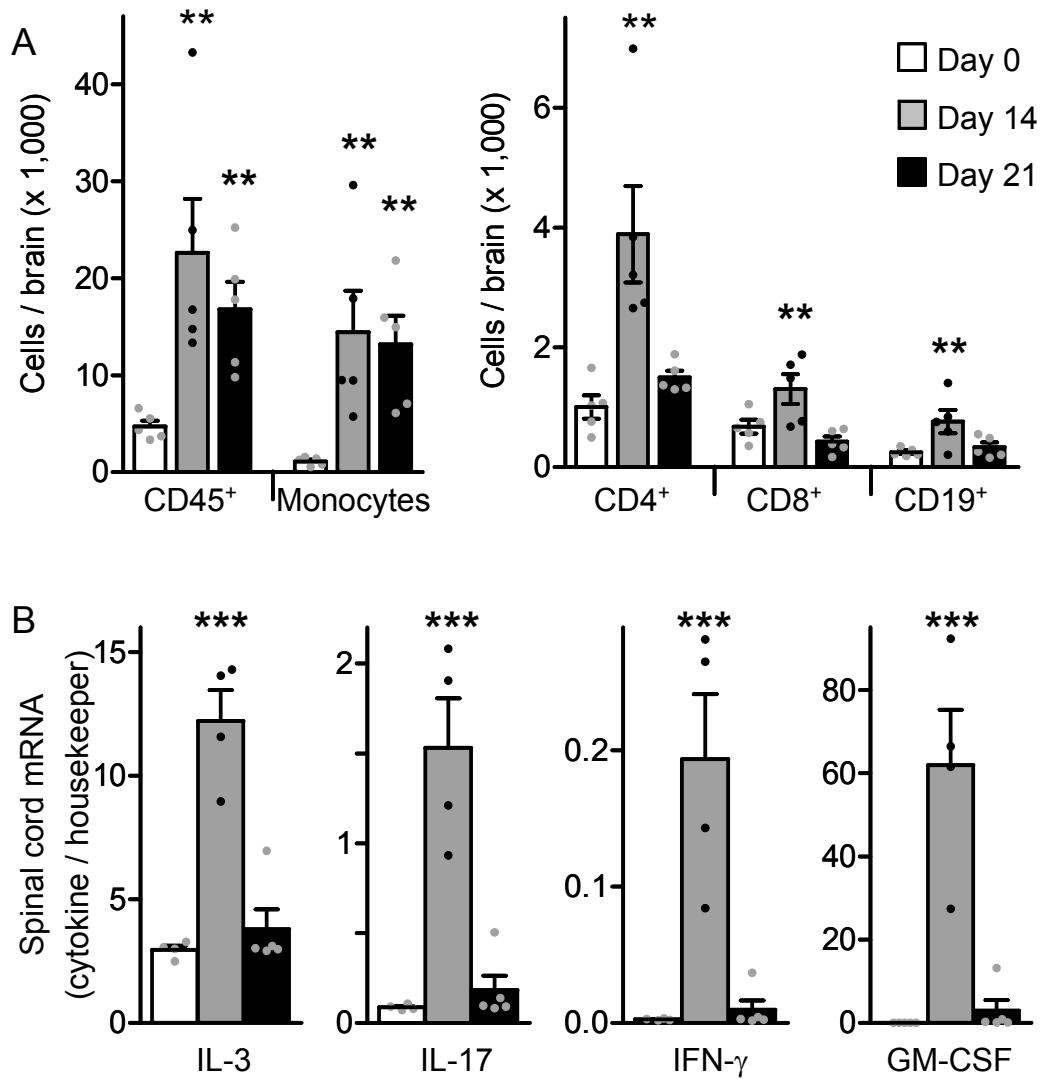

**Supplemental Figure S2. Time course of leukocyte infiltration and cytokine expression in the CNS.**

C57BL/6 mice were immunized with MOG-peptide 35-55 on day 0. (A) Before immunization (day 0) or 14 and 21 days after immunization (5 mice / time point) cells infiltrating the brain were quantified by flow cytometry. CD4<sup>+</sup> T cells, CD8<sup>+</sup> T cells and CD19<sup>+</sup> B cells were markedly increased at day 14, but returned to baseline levels again on day 21. Monocytes largely outnumbered the T cells and remained high in the brain until day 21. (B) Cytokine mRNA levels were quantified in the spinal cord by RT-PCR (4-5 mice / time point). Data are represented as mean  $\pm$  SEM. ANOVA test of day 14 or day 21 vs. day 0: \*\*P<0.01, \*\*\*P<0.001.

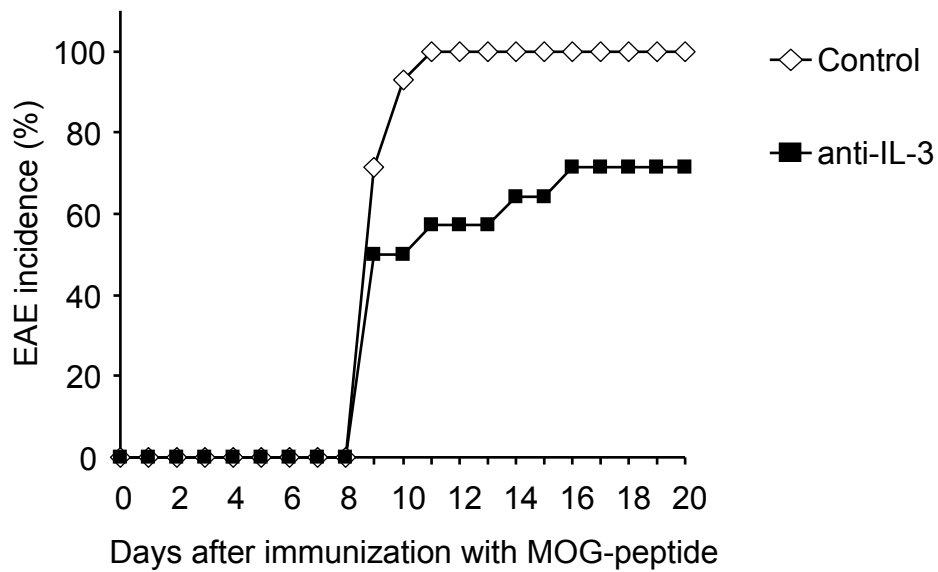

**Supplemental Figure S3. Blockade of IL-3 delays the onset and reduces the incidence of EAE.**

EAE was induced in C57BL/6 mice by immunization with MOG-peptide 35-55 on day 0. From day 0-19 mice were treated with an intact anti-IL-3 antibody (anti-IL-3, 50 µg/day) or purified rat IgG (Control, 50 µg/day) (n = 14 / group). The incidence (%) of EAE (EAE score >0) is depicted. One out of 2 representative experiments is shown.

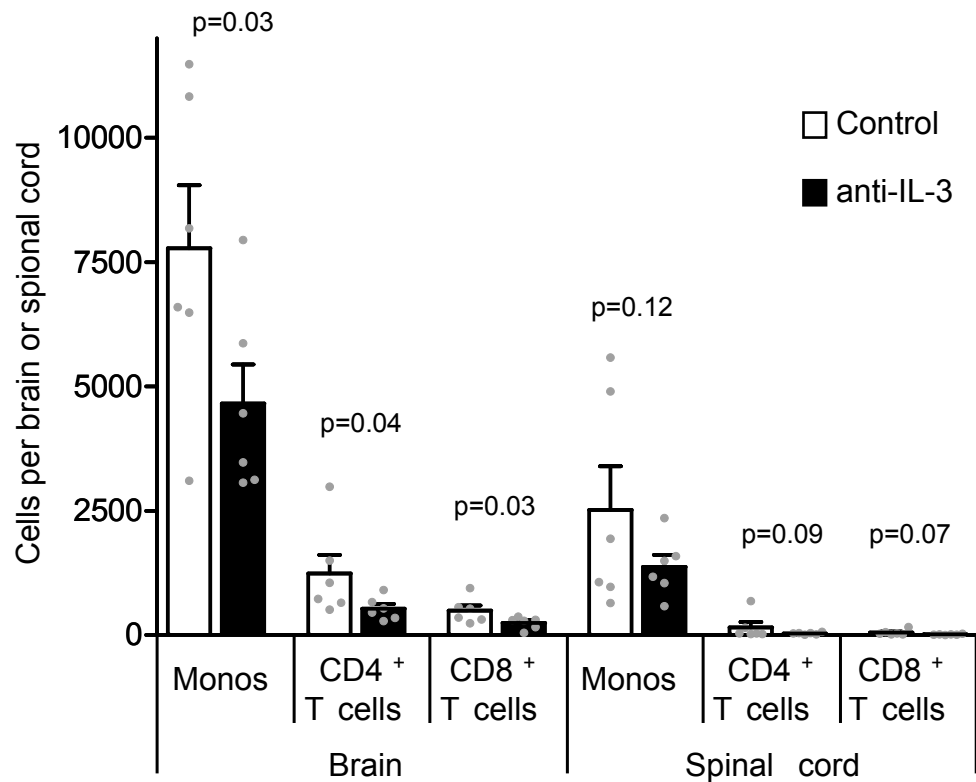

**Supplemental Figure S4. Blockade of IL-3 reduces the immune cell infiltrate in the brain and spinal cord.**

EAE was induced in C57BL/6 mice by immunization with MOG-peptide 35-55 on day 0. From day 0-12 mice were treated with a neutralizing anti-IL-3 antibody (anti-IL-3, 50 µg/day) or purified rat IgG (Control, 50 µg/day) (n = 6 / group). Leukocytes infiltrating the brain and the spinal cord were quantified by flow cytometry on day 13. Infiltrating monocytes (Monos), CD4<sup>+</sup> T cells and CD8<sup>+</sup> T cells were significantly reduced in the brain of mice treated with anti-IL-3. There was also a trend for reduced infiltrates in the spinal cord. Data are represented as mean +/- SEM. Student's T test of anti-IL-3 vs. Control.

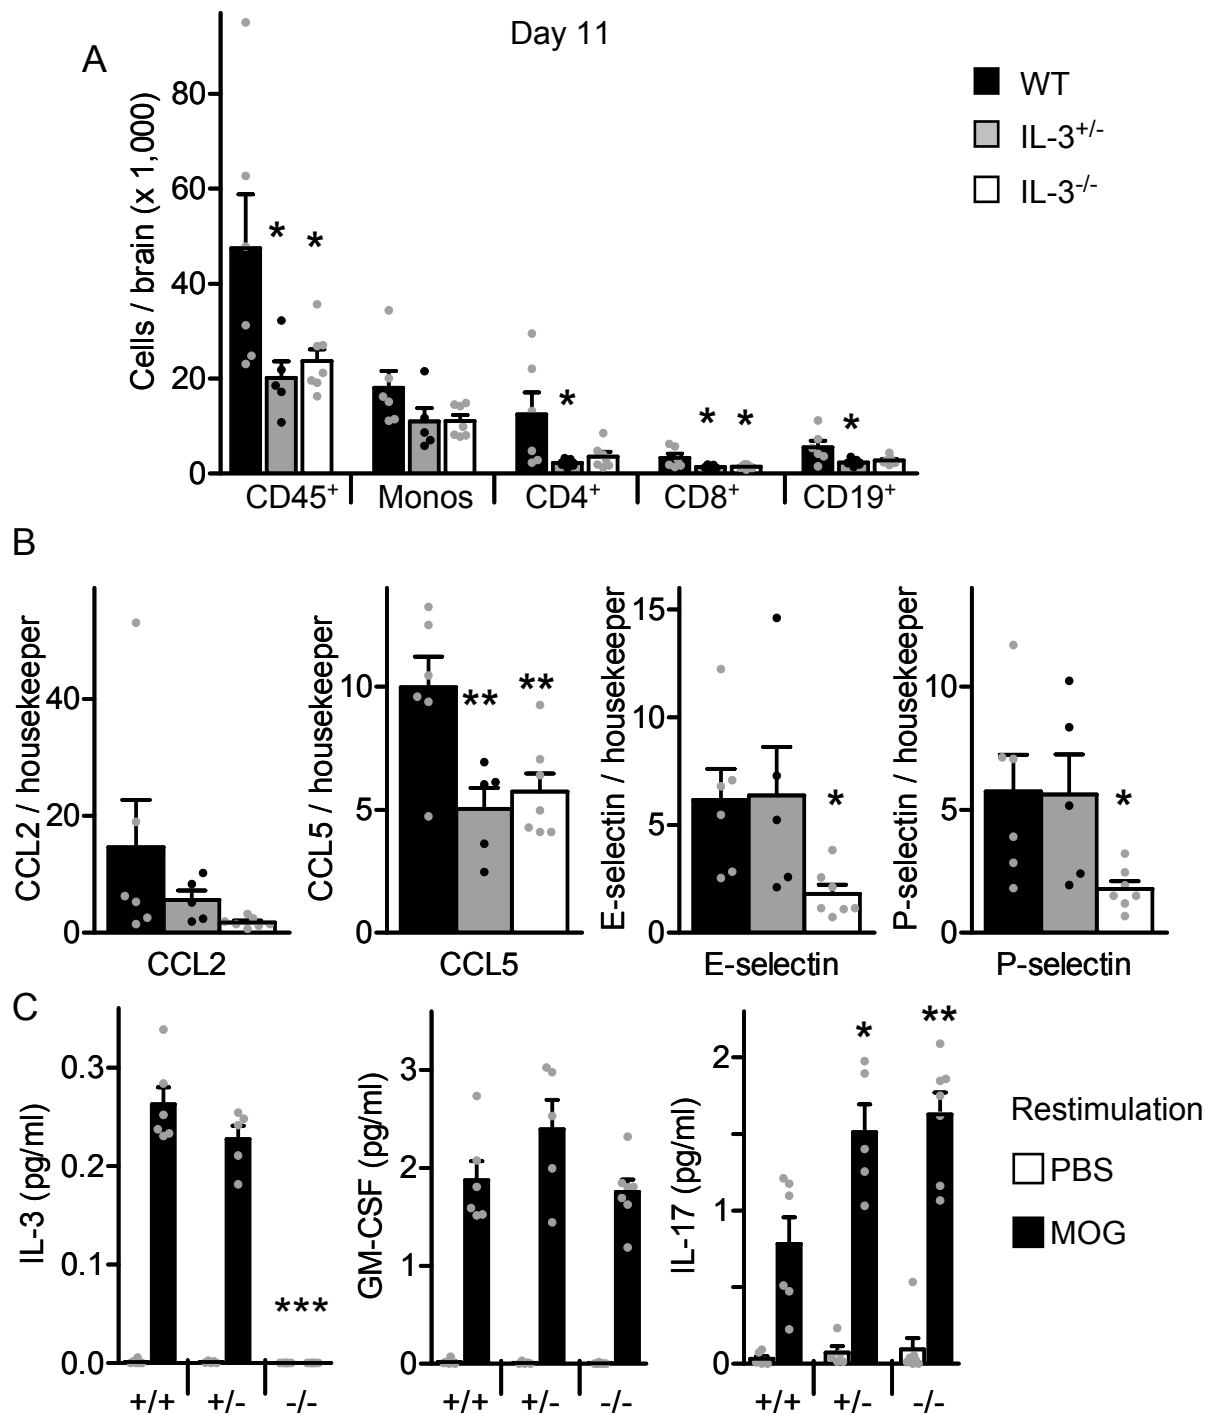

**Supplemental Figure S5. Analysis of IL-3 deficient mice on day 11 after induction of EAE.** EAE was induced in C57BL/6 wild type (IL-3<sup>+/+</sup>, n=6), heterozygous IL-3 deficient (IL-3<sup>+/-</sup>, n=5) and homozygous IL-3 deficient (IL-3<sup>-/-</sup>, n=7) littermates by immunization with MOG-peptide 35-55 on day 0. (A) The immune cell infiltrate was quantified in the brain by flow cytometry on day 11. (B) The expression of CCL2, CCL5, E- and P-selectin was quantified in the spinal cord. (C) Splenocytes were restimulated with MOG-peptide 35-55 or PBS for 3 days and the release of IL-3, GM-CSF and IL-17 was measured in the supernatant by ELISA. Data are represented as mean  $\pm$  SEM. ANOVA test of IL-3<sup>+/-</sup> or IL-3<sup>-/-</sup> vs. IL-3<sup>+/+</sup>: \* $P \leq 0.05$ , \*\* $P < 0.01$ .

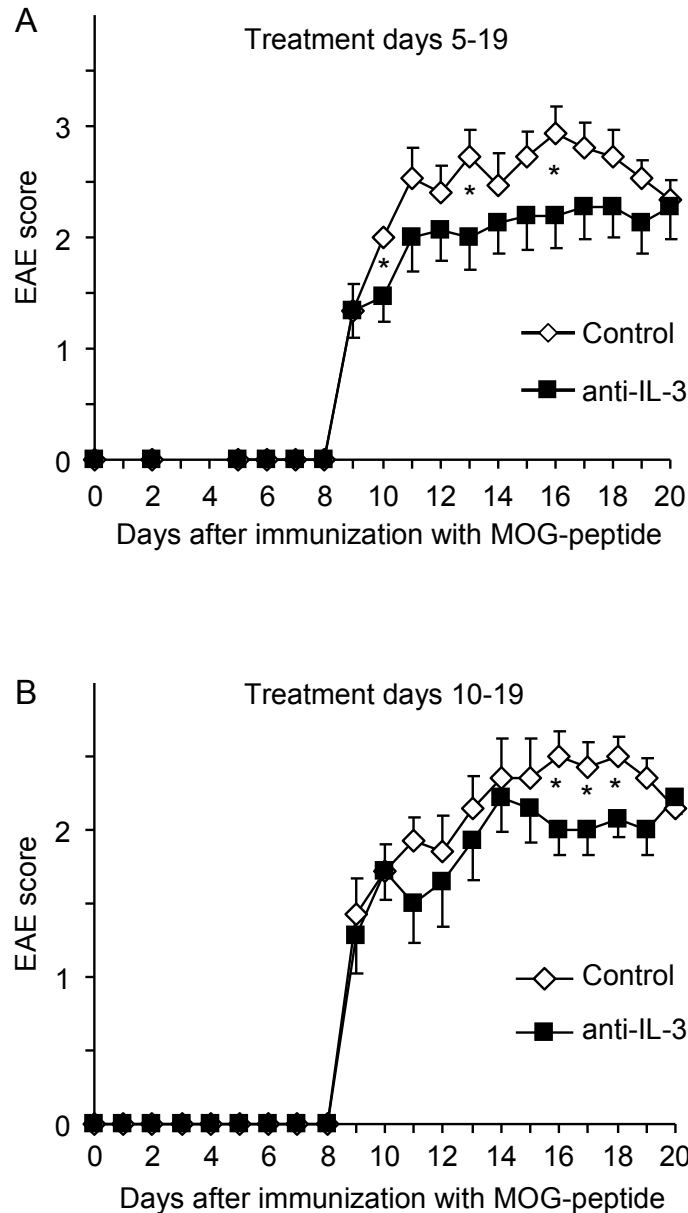

**Supplemental Figure S6. Late blockade of IL-3 has less impact on the development of EAE.**

EAE was induced in C57BL/6 (H-2b) mice by immunization with MOG-peptide 35-55 on day 0. (A) From day 5-19 mice were treated with a neutralizing anti-IL-3 antibody (anti-IL-3, 50 µg/day) or purified rat IgG (Control, 50 µg/day) (n = 15 / group). (B) From day 10-19 mice were treated with a neutralizing anti-IL-3 antibody (anti-IL-3, 50 µg/day) or purified rat IgG (Control, 50 µg/day) (n = 14 / group). Data are represented as mean  $\pm$  SEM, Student's T test of anti-IL-3 vs. Control: \* $P \leq 0.05$ .

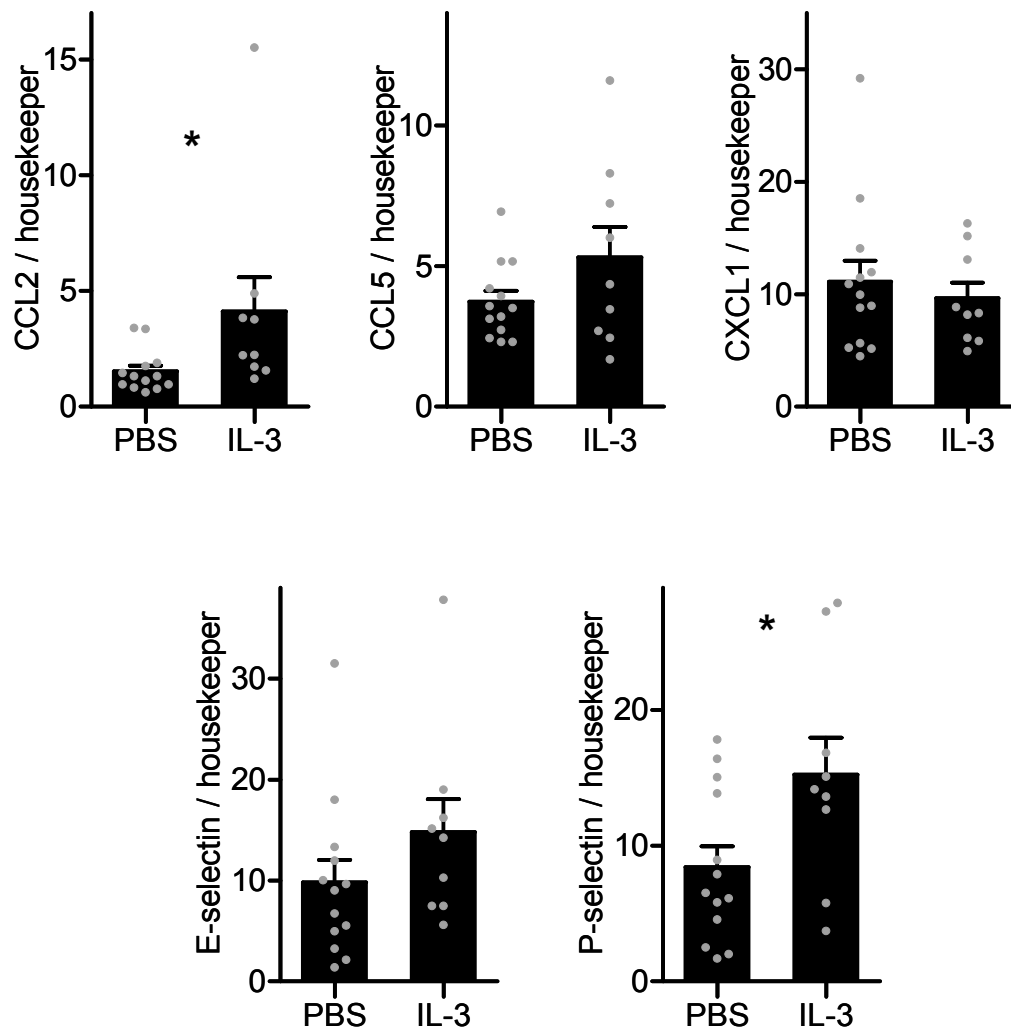

**Supplemental Figure S7. Impact of IL-3 on the expression of chemokines and selectins in the brain.**

EAE was induced in C57BL/6 (H-2b) mice by immunization with MOG-peptide 35-55 on day 0. From day 0-10 mice were treated by daily i.p. injection of 200 ng recombinant murine IL-3 (IL-3, n=9) or PBS as control (PBS, n=13) and analysed on day 11. Expression of CCL2, CCL5, CXCL1, E-selectin and P-selectin was quantified in the brain by RT-PCR. Data are represented as mean  $\pm$  SEM, Student's T test of IL-3 vs. PBS: \* $P \leq 0.05$ .

**Supplemental Table 1. Characteristics of MS patients and controls**

| <b>Case</b> | <b>Sex</b> | <b>Type of disease</b> | <b>Age (years)</b> | <b>Years since diagnosis</b> | <b>EDSS</b> | <b>Immunomodulation</b>                     |
|-------------|------------|------------------------|--------------------|------------------------------|-------------|---------------------------------------------|
| 1           | M          | Control                | 49                 | n.a.                         | n.a.        | n.a.                                        |
| 2           | F          | Control                | 22                 | n.a.                         | n.a.        | n.a.                                        |
| 3           | F          | Control                | 22                 | n.a.                         | n.a.        | n.a.                                        |
| 4           | M          | Control                | 21                 | n.a.                         | n.a.        | n.a.                                        |
| 5           | F          | Control                | 18                 | n.a.                         | n.a.        | n.a.                                        |
| 6           | M          | Control                | 23                 | n.a.                         | n.a.        | n.a.                                        |
| 7           | F          | Control                | 49                 | n.a.                         | n.a.        | n.a.                                        |
| 8           | M          | Control                | 46                 | n.a.                         | n.a.        | n.a.                                        |
| 9           | F          | Control                | 41                 | n.a.                         | n.a.        | n.a.                                        |
| 10          | F          | Control                | 31                 | n.a.                         | n.a.        | n.a.                                        |
| 11          | F          | Control                | 28                 | n.a.                         | n.a.        | n.a.                                        |
| 12          | F          | Control                | 48                 | n.a.                         | n.a.        | n.a.                                        |
| 13          | F          | Control                | 35                 | n.a.                         | n.a.        | n.a.                                        |
| 14          | F          | Control                | 25                 | n.a.                         | n.a.        | n.a.                                        |
| 15          | M          | Control                | 32                 | n.a.                         | n.a.        | n.a.                                        |
| 16          | F          | Control                | 48                 | n.a.                         | n.a.        | n.a.                                        |
| 17          | M          | Control                | 26                 | n.a.                         | n.a.        | n.a.                                        |
| 18          | F          | Control                | 23                 | n.a.                         | n.a.        | n.a.                                        |
| 19          | F          | Control                | 23                 | n.a.                         | n.a.        | n.a.                                        |
| 20          | F          | Control                | 22                 | n.a.                         | n.a.        | n.a.                                        |
| 21          | M          | Control                | 24                 | n.a.                         | n.a.        | n.a.                                        |
|             |            |                        |                    |                              |             |                                             |
| 22          | F          | RRMS active disease    | 43                 | 1                            | 4           | None                                        |
| 23          | M          | RRMS active disease    | 42                 | 0                            | 1           | None                                        |
| 24          | M          | RRMS active disease    | 44                 | 0                            | 1           | None                                        |
| 25          | F          | RRMS active disease    | 32                 | 7                            | 2.5         | Natalizumab (Tysabri <sup>TM</sup> )        |
| 26          | F          | RRMS active disease    | 42                 | 0                            | 2           | None                                        |
| 27          | M          | RRMS active disease    | 26                 | 0                            | 3.5         | None                                        |
| 28          | M          | RRMS active disease    | 32                 | 1                            | 2           | Interferon-beta-1a (Avonex <sup>TM</sup> )  |
| 29          | F          | RRMS active disease    | 19                 | 4                            | 2           | None                                        |
| 30          | F          | RRMS active disease    | 23                 | 1                            | 3           | Dimethylfumarate (Tecfidera <sup>TM</sup> ) |
| 31          | F          | RRMS active disease    | 36                 | 0                            | 2           | None                                        |
| 32          | F          | RRMS active disease    | 26                 | 11                           | 2           | None                                        |
| 33          | F          | RRMS active            | 33                 | 0                            | 2           | None                                        |

|    |   |                       |    |     |     |                               |
|----|---|-----------------------|----|-----|-----|-------------------------------|
|    |   | disease               |    |     |     |                               |
| 34 | F | RRMS active disease   | 29 | 6   | 2   | Glatirameracetate (Copaxone™) |
| 35 | F | RRMS active disease   | 24 | 0   | 4.5 | None                          |
| 36 | M | RRMS active disease   | 50 | 0   | 2   | None                          |
| 37 | F | RRMS active disease   | 23 | 0   | 2   | None                          |
| 38 | F | RRMS active disease   | 54 | 4   | 5.5 | Dimethylfumarate (Tecfidera™) |
| 39 | F | RRMS active disease   | 47 | 0   | 2   | None                          |
| 40 | M | RRMS active disease   | 42 | 0   | 2   | None                          |
|    |   |                       |    |     |     |                               |
| 41 | F | RRMS inactive disease | 23 | 0.5 | 0   | Interferon-beta-1a (Avonex™)  |
| 42 | F | RRMS inactive disease | 43 | 0.5 | 0   | Glatirameracetate (Copaxone™) |
| 43 | F | RRMS inactive disease | 51 | 2   | 2.5 | Interferon-beta-1a (Rebif™)   |
| 44 | F | RRMS inactive disease | 50 | 3   | 1.5 | Interferon-beta-1b (Extavia™) |
| 45 | F | RRMS inactive disease | 38 | 1   | 3   | None                          |
| 46 | F | RRMS inactive disease | 46 | 0.5 | 2   | None                          |
| 47 | F | RRMS inactive disease | 45 | 0.5 | 0   | None                          |
| 48 | F | RRMS inactive disease | 42 | 0.5 | 2.5 | Interferon-beta-1a (Avonex™)  |
| 49 | M | RRMS inactive disease | 54 | 0.5 | 1.5 | None                          |
| 50 | M | RRMS inactive disease | 27 | 0.5 | 1.5 | Natalizumab (Tysabri™)        |
| 51 | M | RRMS inactive disease | 36 | 0.5 | 2   | Interferon-beta-1a (Rebif™)   |
| 52 | F | RRMS inactive disease | 35 | 7   | 0   | Glatirameracetate (Copaxone™) |
| 53 | F | RRMS inactive disease | 55 | 11  | 3   | Glatirameracetate (Copaxone™) |
| 54 | F | RRMS inactive disease | 33 | 2   | 1.5 | Glatirameracetate (Copaxone™) |
| 55 | F | RRMS inactive disease | 42 | 12  | 3   | Interferon-beta-1b (Extavia™) |
| 56 | F | RRMS inactive disease | 19 | 4   | 1   | Dimethylfumarate (Tecfidera™) |
| 57 | F | RRMS inactive disease | 38 | 13  | 1.5 | None                          |

|    |   |                       |    |     |     |                                             |
|----|---|-----------------------|----|-----|-----|---------------------------------------------|
| 58 | M | RRMS inactive disease | 55 | 8   | 3   | None                                        |
| 59 | F | RRMS inactive disease | 26 | 10  | 1.5 | None                                        |
| 60 | F | RRMS inactive disease | 33 | 0.5 | 0   | Dimethylfumarate (Tecfidera <sup>TM</sup> ) |
| 61 | F | RRMS inactive disease | 36 | 10  | 0   | Dimethylfumarate (Tecfidera <sup>TM</sup> ) |
| 62 | F | RRMS inactive disease | 49 | 15  | 2   | None                                        |
| 63 | F | RRMS inactive disease | 64 | 18  | 3.5 | None                                        |
| 64 | F | RRMS inactive disease | 44 | 12  | 1.5 | None                                        |
| 65 | F | RRMS inactive disease | 31 | 15  | 3.5 | Dimethylfumarate (Tecfidera <sup>TM</sup> ) |
| 66 | F | RRMS inactive disease | 43 | 19  | 2   | Interferon-beta-1a (Rebif <sup>TM</sup> )   |
| 67 | M | RRMS inactive disease | 57 | 12  | 3.5 | None                                        |
| 68 | F | RRMS inactive disease | 45 | 15  | 0   | Interferon-beta-1b (Extavia <sup>TM</sup> ) |
| 69 | F | RRMS inactive disease | 33 | 15  | 1.5 | Dimethylfumarate (Tecfidera <sup>TM</sup> ) |
| 70 | M | RRMS inactive disease | 50 | 0.5 | 2   | Teriflunomide (Aubagio <sup>TM</sup> )      |
